# Supplementary material for: Running ameliorates methamphetamine-associated cognitive impairment by regulating hippocampal neurogenesis through the GSK3β/β-catenin pathway
Source: Research Square preprint supplement (doi:10.21203/rs.3.rs-3875295/v1), 2024-02-05
Supplement: Supplementary file 1 [file 065b270c210d82fae1075e2a.docx]

**Supplementary Tables**

Supplementary Table 1 Up-regulated genes information.

| Gene  name | padj | log2FC | C1 | C2 | C3 | M1 | M2 | M3 | M4 |
| --- | --- | --- | --- | --- | --- | --- | --- | --- | --- |
| Hif3a | 2.89E-16 | 2.878 | 18.7 | 16.8 | 34.8 | 233.0 | 134.6 | 115.2 | 206.7 |
| Rbm3 | 3.51E-16 | 1.048 | 653.1 | 689.9 | 590.2 | 1592.8 | 1281.9 | 1105.9 | 1351.1 |
| Sgk1 | 1.16E-11 | 1.051 | 870.9 | 1020.2 | 940.0 | 1557.1 | 1630.8 | 2143.2 | 2484.0 |
| Tsc22d3 | 6.69E-11 | 0.742 | 922.2 | 772.7 | 900.3 | 1466.1 | 1353.7 | 1335.2 | 1634.1 |
| Rhou | 1.12E-10 | 0.667 | 657.8 | 623.9 | 636.9 | 1046.7 | 941.0 | 997.4 | 1076.8 |
| Dhx33 | 3.77E-10 | 0.577 | 966.2 | 1014.9 | 1047.3 | 1442.2 | 1462.4 | 1512.2 | 1605.1 |
| Adipor2 | 6.18E-10 | 0.668 | 735.4 | 776.9 | 769.1 | 1291.6 | 1245.0 | 1053.5 | 1243.9 |
| Rasal2 | 3.21E-09 | 0.586 | 1538.0 | 1579.0 | 1857.2 | 2651.5 | 2567.8 | 2342.1 | 2392.2 |
| Galnt15 | 5.66E-09 | 2.003 | 37.4 | 22.0 | 20.9 | 112.7 | 79.7 | 119.0 | 119.8 |
| Sdc4 | 3.97E-08 | 0.531 | 883.0 | 807.3 | 897.3 | 1272.1 | 1229.1 | 1278.1 | 1207.2 |
| Slc2a1 | 5.83E-08 | 0.716 | 1339.9 | 1161.7 | 1244.1 | 1919.0 | 1723.5 | 2049.0 | 2510.1 |
| Zbtb16 | 7.48E-08 | 0.578 | 640.1 | 740.2 | 698.6 | 1081.4 | 973.9 | 1027.8 | 1051.7 |
| Plin4 | 4.48E-07 | 2.419 | 15.0 | 18.9 | 22.9 | 186.4 | 58.8 | 70.4 | 88.9 |
| Lrrc8c | 1.14E-06 | 0.617 | 415.8 | 481.3 | 478.0 | 757.4 | 694.8 | 662.4 | 696.3 |
| Per1 | 2.04E-06 | 0.521 | 922.2 | 905.9 | 872.4 | 1401.1 | 1357.7 | 1167.7 | 1243.0 |
| Rnf19a | 7.34E-06 | 0.515 | 679.3 | 767.5 | 755.2 | 1058.6 | 1027.7 | 972.6 | 1133.8 |
| Dusp5 | 1.27E-05 | 0.750 | 299.0 | 251.6 | 265.3 | 507.1 | 485.5 | 371.2 | 468.4 |
| Gm19439 | 4.66E-05 | 1.637 | 39.2 | 37.7 | 43.7 | 155.0 | 79.7 | 81.8 | 184.5 |
| Fzd4 | 5.23E-05 | 0.687 | 214.9 | 244.3 | 260.3 | 341.3 | 388.8 | 413.0 | 399.8 |
| Ciart | 6.40E-05 | 1.516 | 70.1 | 48.2 | 58.6 | 234.1 | 228.3 | 116.1 | 98.5 |
| Sult1a1 | 6.40E-05 | 1.093 | 70.1 | 66.1 | 83.5 | 126.8 | 144.5 | 189.4 | 163.2 |
| Ahnak | 6.40E-05 | 0.685 | 485.0 | 508.5 | 409.4 | 704.3 | 706.8 | 944.1 | 650.9 |
| OlfmL2b | 6.40E-05 | 0.605 | 493.4 | 650.1 | 596.2 | 923.2 | 745.6 | 892.7 | 964.8 |
| Klf15 | 0.00012 | 0.620 | 325.2 | 289.4 | 337.8 | 461.6 | 437.6 | 500.6 | 551.5 |
| Mc4r | 0.00012 | 1.166 | 54.2 | 67.1 | 63.6 | 128.9 | 125.6 | 114.2 | 183.5 |
| Xdh | 0.00014 | 1.141 | 67.3 | 68.2 | 48.7 | 171.2 | 119.6 | 119.9 | 131.3 |
| Per2 | 0.00025 | 0.560 | 384.0 | 418.3 | 493.9 | 693.5 | 626.0 | 650.0 | 578.5 |
| Hectd2 | 0.00029 | 0.625 | 279.4 | 365.9 | 332.9 | 538.5 | 528.3 | 516.8 | 426.9 |
| Trp53inp1 | 0.00029 | 0.581 | 280.3 | 263.2 | 250.4 | 386.8 | 381.8 | 425.4 | 389.2 |
| Lingo3 | 0.00041 | 0.527 | 772.7 | 797.9 | 633.0 | 1031.6 | 1130.4 | 903.2 | 1169.6 |
| Tfrc | 0.00067 | 0.513 | 1775.4 | 2343.4 | 1823.4 | 3194.4 | 3106.1 | 2486.8 | 2517.8 |
| Cirbp | 0.00074 | 0.564 | 754.1 | 556.7 | 569.4 | 986.0 | 867.2 | 812.7 | 1043.0 |
| Etnppl | 0.00076 | 0.833 | 147.6 | 152.0 | 223.6 | 350.0 | 244.2 | 359.7 | 288.8 |
| Atp10a | 0.00095 | 0.823 | 191.6 | 133.2 | 183.8 | 330.5 | 370.8 | 244.6 | 255.9 |
| Fras1 | 0.00117 | 0.646 | 300.9 | 245.3 | 257.4 | 433.4 | 508.4 | 366.4 | 370.9 |
| Hecw2 | 0.00117 | 0.537 | 393.4 | 440.4 | 451.1 | 633.9 | 710.7 | 520.6 | 620.0 |
| Plekhf1 | 0.00132 | 1.369 | 36.4 | 49.3 | 32.8 | 89.9 | 60.8 | 107.5 | 148.7 |
| Ccdc141 | 0.00215 | 0.615 | 211.2 | 223.3 | 256.4 | 389.0 | 386.8 | 338.8 | 296.5 |
| Gucy1a2 | 0.00248 | 0.694 | 171.0 | 220.2 | 146.1 | 322.9 | 301.0 | 252.2 | 282.0 |
| Map3k6 | 0.00271 | 1.114 | 33.6 | 41.9 | 63.6 | 97.5 | 85.7 | 105.6 | 112.0 |
| Gm45884 | 0.00281 | 0.522 | 687.7 | 1059.0 | 730.3 | 1223.3 | 1228.1 | 1119.2 | 1168.6 |
| Cavin2 | 0.00301 | 0.692 | 130.8 | 155.2 | 122.2 | 217.8 | 200.4 | 249.3 | 210.5 |
| Dyrk3 | 0.00358 | 0.603 | 225.2 | 228.6 | 185.8 | 286.1 | 357.9 | 296.9 | 353.5 |
| Cables1 | 0.00397 | 0.611 | 197.2 | 169.9 | 179.9 | 292.6 | 236.2 | 304.5 | 281.0 |
| Cacng5 | 0.00427 | 0.616 | 193.4 | 207.6 | 158.0 | 299.1 | 300.0 | 247.4 | 295.5 |
| mt-Tl2 | 0.00439 | 0.897 | 73.8 | 117.4 | 78.5 | 168.0 | 156.5 | 209.4 | 134.2 |
| Lin54 | 0.0054 | 0.573 | 216.8 | 238.0 | 194.8 | 335.9 | 328.0 | 273.1 | 351.5 |
| Zfhx4 | 0.00599 | 0.537 | 198.1 | 194.0 | 192.8 | 278.5 | 301.0 | 276.0 | 276.2 |
| Gm38393 | 0.00741 | 0.574 | 221.5 | 294.6 | 242.5 | 317.5 | 436.6 | 385.4 | 363.1 |
| Vcan | 0.00977 | 0.558 | 246.7 | 361.7 | 252.4 | 447.5 | 439.6 | 422.6 | 377.6 |
| Abcg2 | 0.00983 | 0.518 | 353.2 | 310.4 | 247.4 | 428.0 | 468.5 | 449.2 | 395.0 |
| Mfsd2a | 0.0106 | 0.512 | 296.2 | 255.8 | 304.1 | 417.2 | 422.7 | 336.9 | 452.0 |
| Mthfd1l | 0.01352 | 0.587 | 160.7 | 200.3 | 184.8 | 288.2 | 311.0 | 224.6 | 268.5 |
| Map3k9 | 0.01397 | 0.540 | 252.3 | 321.9 | 380.6 | 489.8 | 523.3 | 419.7 | 417.2 |
| Zfp189 | 0.01415 | 0.540 | 284.1 | 368.0 | 411.4 | 475.7 | 601.1 | 551.0 | 432.7 |
| Zfp366 | 0.01675 | 0.712 | 98.1 | 99.6 | 87.4 | 164.7 | 127.6 | 182.7 | 147.8 |
| Gm37111 | 0.01902 | 1.268 | 32.7 | 13.6 | 37.8 | 84.5 | 45.9 | 64.7 | 76.3 |
| Malat1 | 0.01959 | 0.731 | 1970.6 | 1897.8 | 1546.2 | 3082.8 | 2127.2 | 3482.2 | 3287.5 |
| Serpinb8 | 0.02019 | 1.115 | 19.6 | 43.0 | 42.7 | 68.3 | 96.7 | 71.4 | 66.6 |
| Calhm5 | 0.02034 | 0.520 | 165.4 | 162.5 | 165.9 | 239.5 | 240.2 | 248.4 | 216.3 |
| Dzip1l | 0.02034 | 0.507 | 219.6 | 262.1 | 227.6 | 391.2 | 301.0 | 302.6 | 348.6 |
| Paqr5 | 0.023 | 1.134 | 46.7 | 25.2 | 20.9 | 75.8 | 58.8 | 61.9 | 76.3 |
| Il1r1 | 0.02398 | 0.576 | 280.3 | 229.6 | 197.7 | 293.6 | 309.0 | 434.9 | 368.9 |
| Spsb1 | 0.02468 | 0.579 | 394.3 | 356.5 | 294.1 | 586.2 | 346.9 | 580.5 | 567.9 |
| Tlr7 | 0.03084 | 0.880 | 49.5 | 47.2 | 35.8 | 71.5 | 81.7 | 85.7 | 86.0 |
| Pla2g4e | 0.04102 | 0.953 | 32.7 | 61.9 | 33.8 | 87.8 | 97.7 | 74.2 | 70.5 |
| Pdlim2 | 0.04393 | 0.636 | 218.6 | 187.7 | 143.1 | 344.6 | 248.2 | 208.4 | 339.0 |
| Kirrel2 | 0.04747 | 0.533 | 123.3 | 135.3 | 149.1 | 209.1 | 174.4 | 193.2 | 209.6 |
| Dbp | 0.04793 | 1.036 | 525.1 | 369.1 | 403.4 | 1090.1 | 1175.3 | 552.0 | 732.1 |

Supplementary Table 2 Down-regulated genes information.

| gene  name | padj | log2FC | C1 | C2 | C3 | M1 | M2 | M3 | M4 |
| --- | --- | --- | --- | --- | --- | --- | --- | --- | --- |
| Cldn5 | 4.53E-11 | -0.84 | 1134.4 | 1038.0 | 1061.2 | 498.4 | 568.2 | 678.6 | 658.7 |
| Rasl10a | 5.72E-10 | -1.00 | 1407.2 | 1167.0 | 1119.9 | 522.3 | 536.3 | 596.7 | 814.2 |
| St3gal1 | 2.06E-09 | -0.78 | 809.2 | 706.7 | 698.6 | 407.4 | 390.8 | 482.5 | 442.3 |
| Pdia6 | 2.06E-09 | -0.65 | 2128.6 | 2151.5 | 2560.7 | 1376.1 | 1342.7 | 1625.5 | 1473.8 |
| Fabp7 | 2.48E-09 | -1.06 | 654.1 | 665.8 | 524.7 | 372.7 | 305.0 | 278.8 | 226.0 |
| Sox2 | 7.00E-07 | -0.55 | 868.1 | 847.2 | 853.6 | 593.8 | 622.0 | 554.8 | 570.8 |
| Plk5 | 3.81E-06 | -0.75 | 512.0 | 421.5 | 469.0 | 254.6 | 260.2 | 279.8 | 320.6 |
| Sv2c | 6.96E-06 | -0.64 | 757.8 | 675.2 | 715.4 | 476.8 | 445.6 | 523.4 | 392.1 |
| Hspa5 | 7.34E-06 | -0.57 | 4595.4 | 4076.5 | 5784.2 | 3236.6 | 3343.4 | 3464.2 | 2938.9 |
| Trpc6 | 8.06E-06 | -0.69 | 547.6 | 510.6 | 524.7 | 366.2 | 283.1 | 359.7 | 302.3 |
| Rflnb | 1.96E-05 | -0.81 | 422.3 | 470.8 | 315.0 | 238.4 | 239.2 | 220.8 | 222.1 |
| Dio3 | 2.24E-05 | -0.98 | 218.6 | 195.0 | 208.7 | 128.9 | 88.7 | 96.1 | 108.2 |
| Kdr | 5.07E-05 | -0.78 | 399.9 | 438.3 | 429.3 | 218.9 | 259.2 | 305.5 | 198.0 |
| Gm2004 | 5.47E-05 | -2.40 | 61.7 | 117.4 | 62.6 | 28.2 | 20.9 | 3.8 | 8.7 |
| Rbm28 | 6.10E-05 | -0.58 | 821.3 | 778.0 | 823.8 | 464.9 | 493.4 | 630.0 | 565.0 |
| Gsg1l | 6.27E-05 | -0.74 | 834.4 | 571.4 | 696.6 | 357.6 | 378.8 | 452.1 | 493.5 |
| Elk1 | 9.88E-05 | -0.51 | 1731.4 | 1768.8 | 1798.5 | 1050.0 | 1143.4 | 1315.2 | 1445.8 |
| Arntl | 0.00013 | -0.54 | 607.4 | 593.4 | 542.5 | 379.2 | 370.8 | 430.2 | 414.3 |
| Sstr1 | 0.00014 | -0.74 | 427.0 | 509.6 | 426.3 | 250.3 | 215.3 | 312.2 | 311.9 |
| Spata13 | 0.00014 | -0.59 | 598.0 | 558.8 | 546.5 | 430.2 | 328.0 | 350.2 | 399.8 |
| Vwa1 | 0.00016 | -0.64 | 503.6 | 466.6 | 467.0 | 306.6 | 272.1 | 369.3 | 280.1 |
| Glt8d2 | 0.00017 | -0.96 | 307.4 | 290.4 | 286.2 | 104.0 | 210.3 | 159.9 | 130.4 |
| Ddit4l | 0.00019 | -0.97 | 262.6 | 170.9 | 250.4 | 100.8 | 142.5 | 119.9 | 102.4 |
| Hist1h2bc | 0.00034 | -0.50 | 608.3 | 580.9 | 567.4 | 377.1 | 405.7 | 432.1 | 437.5 |
| Hist1h2be | 0.00062 | -1.05 | 137.4 | 161.5 | 175.9 | 59.6 | 65.8 | 105.6 | 74.4 |
| Car12 | 0.00148 | -0.56 | 742.8 | 1024.4 | 867.5 | 576.5 | 517.4 | 713.8 | 573.7 |
| Hist1h1c | 0.00158 | -0.71 | 527.9 | 427.8 | 368.7 | 235.1 | 220.3 | 296.0 | 329.3 |
| Ier5 | 0.00230 | -0.53 | 1148.4 | 900.7 | 866.5 | 651.2 | 678.8 | 566.3 | 791.9 |
| Sox9 | 0.00293 | -0.63 | 584.0 | 651.1 | 612.1 | 452.9 | 495.4 | 344.5 | 294.6 |
| Adamts2 | 0.00440 | -0.72 | 284.1 | 213.9 | 316.0 | 140.9 | 143.5 | 181.8 | 191.2 |
| Nes | 0.00657 | -0.68 | 321.4 | 310.4 | 266.3 | 164.7 | 195.4 | 239.8 | 144.9 |
| Zfp36l1 | 0.00657 | -0.65 | 287.8 | 259.0 | 257.4 | 188.5 | 167.5 | 129.4 | 197.0 |
| Nfil3 | 0.00731 | -0.73 | 234.5 | 201.3 | 204.7 | 126.8 | 93.7 | 155.1 | 139.1 |
| Cbr3 | 0.00741 | -0.78 | 216.8 | 155.2 | 225.6 | 105.1 | 119.6 | 96.1 | 143.9 |
| Btbd17 | 0.00926 | -0.57 | 325.2 | 339.7 | 335.9 | 199.4 | 205.3 | 215.1 | 281.0 |
| Plxdc1 | 0.01027 | -0.75 | 249.5 | 155.2 | 275.2 | 125.7 | 127.6 | 133.2 | 151.6 |
| Arhgef19 | 0.01060 | -0.61 | 413.9 | 338.7 | 412.4 | 228.6 | 204.4 | 330.2 | 254.0 |
| C1ql2 | 0.01245 | -0.79 | 2710.7 | 2344.4 | 2188.1 | 1263.4 | 1065.6 | 1437.1 | 1822.4 |
| Psrc1 | 0.01807 | -0.68 | 200.0 | 177.2 | 243.4 | 125.7 | 100.7 | 154.2 | 135.2 |
| Rnpep | 0.01862 | -0.50 | 678.4 | 505.4 | 632.0 | 408.5 | 345.9 | 440.6 | 512.8 |
| Krt2 | 0.01964 | -0.68 | 190.6 | 145.7 | 179.9 | 102.9 | 97.7 | 128.5 | 101.4 |
| Sdf2l1 | 0.02075 | -0.82 | 214.0 | 129.0 | 281.2 | 144.1 | 104.7 | 106.6 | 117.8 |
| Gm266 | 0.02382 | -1.02 | 112.1 | 64.0 | 82.5 | 39.0 | 34.9 | 56.1 | 40.6 |
| Rpl34-ps1 | 0.02990 | -0.75 | 155.1 | 188.7 | 127.2 | 80.2 | 71.8 | 104.7 | 114.9 |
| 4930539E08Rik | 0.03095 | -0.83 | 106.5 | 83.9 | 126.2 | 72.6 | 55.8 | 56.1 | 54.1 |
| Tacr3 | 0.03365 | -0.83 | 108.4 | 94.4 | 93.4 | 45.5 | 46.9 | 60.9 | 68.6 |
| Creld2 | 0.04010 | -0.51 | 254.2 | 206.6 | 231.5 | 157.1 | 150.5 | 161.8 | 177.7 |
| Mmp14 | 0.04638 | -0.55 | 364.4 | 392.1 | 315.0 | 178.8 | 235.3 | 319.8 | 239.5 |

Supplementary Table 3 List of Primers for Real-time PCR.

| Gene | Primer sequence (5’-3’) |
| --- | --- |
| *Nestin*  *Sox2*  *Ccnd1*  *c-Myc*  *Neurod1*  *Neurog2*  *Gapdh* | Forward: ATACAGGACTCTGCTGGA  Reverse: AGGACACCAGTAGAACTG  Forward: GGGCTCTGTGGTCAAGTCCG  Reverse: CGCTCTGGTAGTGCTGGGC  Forward: GCGCCCTCCGTATCTTACTT  Reverse: ACCTCCTCTTCGCACTTCTG  Forward: CGGGGCTTTATCTAACTCGC  Reverse: GCTATGGGCAAAGTTTCGTG  Forward: ATCAAGAAGACCCGCAGGC  Reverse: GGTGAGCGCCCAGATGTAAT  Forward: GCTCAGCATCAATGGCAACTT  Reverse: GCAGGGTAGTGCATGGTAAAG  Forward: TGCGACTTCAACAGCAACTC  Reverse: ATGTAGGCAATGAGGTCCAC |
