# Supplementary material for: Running ameliorates methamphetamine-associated cognitive impairment by regulating hippocampal neurogenesis through the GSK3β/β-catenin pathway
Source: Research Square preprint supplement (doi:10.21203/rs.3.rs-3875295/v1), 2024-02-05
Supplement: Supplementary file 2 [file 6cc6716e48db26ca42d780f5.docx]

**Running ameliorates methamphetamine-associated cognitive impairment by regulating hippocampal neurogenesis through the GSK3β/β-catenin pathway**

Jiancong Lu1, 2†, Chuanxiang Chen2†, Ce Liu3†, Jingyi Zhang4, Liang Zhang5, Cui Zhang6, Yining Zhang7, Xiaojun Chen8, Feng Qiu3*, Xu Zhao4*, Huijun Wang2, 3*

1 The Third Affiliated Hospital of Southern Medical University, Guangzhou 510630, China.

2 School of Forensic Medicine, Southern Medical University, Guangzhou 510515, China.

3 Department of Laboratory Medicine, The Seventh Affiliated Hospital, Southern Medical University, Foshan 528200, China.

4 Centre of General Practice, The Seventh Affiliated Hospital, Southern Medical University, Foshan 528200, China.

5 Forensic Science Center of Guangdong Provincial Public Security Bureau, Guangzhou 510050, China.

6 Shenzhen Key Laboratory of Drug Addiction, Shenzhen Neher Neural Plasticity Laboratory, Shenzhen Institute of Advanced Technology, Chinese Academy of Sciences (CAS), Shenzhen, 518055, China.

7 School of Basic Medical Sciences, Henan University of Science and Technology, Luoyang 471000, China.

8 School of Chinese Materia Medica, Guangdong Pharmaceutical University, Guangzhou 510006, China.

*** Correspondence:**

Corresponding Authors are Huijun Wang, Xu Zhao and Feng Qiu

E-mail: hjwang@smu.edu.cn; zhaoxu_0912@163.com; qiufeng3079@smu.edu.cn

**† These authors contributed equally to this work.**

**Materials and methods**

**Stereotaxic injection**

Mice were deeply anesthetized with 1% pentobarbital sodium (40 mg/kg, i.p.) and secured in a stereotaxic frame (RWD, Shenzhen, China). Bilateral injections with adeno-associated virus (AAV) per brain region were administered. The injection syringe (65460-02, Hamilton Company, Reno, NV, USA) delivered the AAV at a constant volume of 100 nl/min using a syringe pump (RWD, Shenzhen, China). The needle was left in place for 3 min after each injection to minimize the upward flow of the viral solution after raising the needle. The injection coordinates of the hippocampal DG were −2.0 (AP), ±1.7 (ML), −2.0 (DV) from bregma. Both AAV-Nestin-EGFP and AAV-Nestin-Ctnnb1 were purchased from the Obio Technology Corp., ltd., Shanghai, China. Animals injected with virus were used for assessments of behaviors and neurogenesis 3 weeks after the injection.

**Conditioned place preference (****CPP)**

Habitation (day1): mice were placed into central compartments and allowed to freely shuttle between the 3 compartments for 30min, eliminating mice that spent > 65% or < 35% of the total time on one side. Conditioning period (day2-day9): 2mg/kg METH or equivalent saline was given every other day and placed in the corresponding compartment for 30min for 8 days. Retention (day10): mice were placed in central compartments and allowed to travel freely through the 3 compartments for 15min and videotaped. An overhead camera was used to record and Smart 3.0 (Panlab, Spain) was used to analyze the videos. CPP scores are shown as time spent in the drug-paired compartments minus time spent in the non-drug-paired compartments. The activity chamber was cleaned with 70% ethanol after each use.

**Open field test (****OFT)**

Mice were placed into the center of an open field arena (40 cm×40 cm×40 cm) and allowed to freely explore the environment for 5 min. An overhead camera was used to record and Smart 3.0 was used to analyze the videos. The center of the open field arena was set as 20 cm×20 cm. The activity chamber was cleaned with 70% ethanol after each use.

**Elevated plus maze (****EPM)**

Mice were placed individually in the center of the maze facing an open arm and allowed to freely explore for 5 min. An overhead camera was used to record and Smart 3.0 was used to analyze the videos. The activity chamber was cleaned with 70% ethanol after each use.

**Novel object recognition test (****NORT)**

NORT was performed in an open field apparatus on 3 successive days and included three phases: habituation, training, and testing. Habitation (day1): mice were placed in a chamber (33 cm×33 cm×40 cm) and allowed to freely explore the arena for 5 min in the absence of objects. Training (day2): mice were placed in the same chamber containing the same two objects and allowed to explore for 5 min. Testing (day3): after 24 hours, one of the old object was replaced by a novel object, and the time spent exploring two different objects was recorded when a mouse's nose touched or sniffed the object or when the head of the animal was oriented towards the object and within 2 cm from the object. The exploratory preference index, a ratio of the amount of time spent exploring the novel object to the total amount of time spent exploring both objects, was used to assess memory.

**Passive avoidance test (****P.A. Test)**

Mice were placed into the light compartments of the passive avoidance device (product code 40550, Ugo Basile, Italy). After 30 seconds, the sliding door in the middle of the dark and bright compartments automatically opens for 60s. The mice entered the black compartment would receive foot shock (0.5mA，1s). Then mice would be placed into the light compartments after 24 hours, and the time from opening to closing of automatic doors has been extended to 300s. The latency time was used to assess memory.

**Y-maze**

Mice were placed in the start arm and allowed to freely explore all three open arms for 5 min, and the numbers of sequential entries into all three arms were recorded with a camera. Sequential entries proceeding clockwise or counter clockwise, such as 123, 231, and 321, were defined as correct, while alternations such as 131, 212, and 323 were defined as incorrect. The percentage of spontaneous alternations is the number of correct sequential entries divided by the maximum number of possible alternations (number of total arm entries minus 2) and multiplied by 100.

**Barnes maze**

A white circular platform (92 cm diameter, 50 cm above the floor) contained 20 holes equally spaced around its perimeter. Under one of the holes there was a black escape box. Barnes maze was performed on 6 successive days and included three phases: habituation, training, and testing. Habitation (day1): mice were allowed 5 minutes to freely explore the maze, with no escape box present. Training(day2-day5): mice were given 3 trials per day and allowed 3 minutes to enter the escape box, where they remained for 60s. If a mouse failed to find the escape box, it was guided by the experimenter. Testing (day6): the escape box was removed from the maze, and mice were allowed to search for 90s. An overhead camera was used to record and Smart 3.0 was used to analyze the videos. the platform was cleaned with 70% ethanol and rotated after each used, and the spatial location of the escape hole remained in a fixed location with respect to the distal room cues.

**Western blotting.**

Total Hippocampal protein was obtained by lysed in RIPA buffer with protease and phosphatase inhibitors at 4°C for 30 min. Nucleoprotein was obtained using a nuclear extraction kit (ab113474, Abcam, Cambridge, UK) according to the manufacturer’s instructions. Protein samples were separated on a 12% sodium dodecyl sulfate polyacrylamide gel (SDS-PAGE). Gels were transferred onto polyvinylidene difluoride (PVDF) membranes (Millipore, Billerica, MA, USA). Membranes were blocked with 5% skim milk for 1 h at room temperature, incubated with primary antibody overnight at 4 °C, and incubated with horseradish peroxidase (HRP) -conjugated secondary antibody for 1 h. Then Chemiluminescence ECL Plus-Western Blotting detection reagent membrane was developed. Band intensities were quantified for protein bands using Image J software and normalized using β-Actin or Lamin B1. The primary antibodies were as follows: anti-β-catenin antibody (1:1000 dilution, ab32572, Abcam, Cambridge, UK), anti-GSK3β antibody (1:1000 dilution, #12456, Cell Signaling Technology, Danvers, MA, USA), anti-Phospho-GSK3β (Ser9) antibody (1:1000 dilution, #5558, Cell Signaling Technology, Danvers, MA, USA), anti-Lamin B1 antibody (1:100 dilution, #AF5161, Affinity, Changzhou, China) and anti- β-Actin antibody (1:1000 dilution, #4970, Cell Signaling Technology, Danvers, MA, USA).

**Tissue preparation and immunofluorescence staining**

Mice were anesthetized with pentobarbital sodium and perfused with ice-cold 0.9% saline solution, followed by ice-cold 4% paraformaldehyde. Brains were removed, fixed in 4% paraformaldehyde in 0.1 M PBS overnight at 4 °C, and dehydrated with 30% sucrose for 1 day. Coronal sections with a thickness of 40 μm were incubated in cryopreservation solution at −20 °C until immunofluorescence staining was performed.

For BrdU immunostaining, a pretreatment of the sections for DNA denaturation with 2N HCl for 30 min at room temperature (RT) was performed. For immunofluorescence staining, fixed tissue sections were blocked with 5% fetal bovine serum (FBS) -0.3% Triton X-100 and primary antibodies incubated in 1% FBS-0.3% Triton X-100 occurred overnight at 4°C as following: rat anti-BrdU (1:250; AB6326, Abcam, Cambridge, UK), rabbit anti-doublecortin (DCX; 1:500; AB18723, Abcam, Cambridge, UK), mouse anti-GFAP (GFAP; 1:300; #3670, Cell Signaling Technology, Danvers, MA, USA), rabbit anti-NeuN (1:500; ABN78, Millipore, Billerica, MA, USA), rabbit anti-Sox2 (1:500; AB5603，Millipore, Billerica, MA, USA), rabbit anti-Ki67 (1:500; 27309-1-AP, Proteintech, Wuhan, China), Rat anti-Ki67 (1:250; 14-5698-82, Invitrogen, San Diego, CA, USA). Fluorescent secondary antibodies (Alexa 488, 555 and 647; Invitrogen, San Diego, CA, USA), anti-rat, anti-rabbit and anti-mouse, were used to detect the respective primary antibodies at a dilution of 1:500 (in 1% FBS-0.3%Triton X-100) for 2 h at RT. To label the nucleus, incubation with DAPI (H-1200, Vector Laboratories, Inc., Burlingame, CA, USA) was performed. The detection of apoptotic cells was obtained using a cell death detection kit (12156792910, Roche, Indianapolis, IN, USA) according to the manufacturer’s instructions. Fluorescence images were acquired with the Olympus FV3000 confocal microscope (Olympus, Japan) and the number of positive cells calculated using Olympus FV1000 software and image J.

**RNA extraction, reverse transcription, and quantitative real-time polymerase chain reaction (qRT-PCR)**

Total RNA from left ventricular myocardium of each group of mice was extracted by Trizol (Thermo, USA). mRNA was reverse transcribed into cDNA using a cDNA synthesis kit (Vazyme, China) according to the manufacturer's instructions. The RT-qPCR reaction was carried out using ChamQ SYBR qPCR Master Mix (Vazyme, China). GAPDH was used as the reference. Relative gene expression was calculated using the 2-ΔΔCt method. The primers used in this study was listed in Supplementary Table3.

**Supplementary figures legends**

**Supplementary Fig1**. **Low-dose methamphetamine (METH) could not induce anxiety in mice.** (A) Diagram of the experimental procedure. (B-D) Representative OFT tracks and statistical analysis of total distance and central time of OFT (n=15 per group). (E-G) Representative EPM tracks and statistical analysis of total distance and central time in EPM (n=15 per group). The data are shown as mean ± SEM. ns, No significance.

**Supplementary Fig2. Low-dose METH-induced cognitive impairment is not mediated by hippocampal neuron cells death**. No apoptotic neurons or aberrant morphology was observed in the hippocampus. (n = 8 segments/group, sampled from 3 mice/treatment condition). Scale bar = 100 μm.

**Supplementary Fig3**. **METH-induced cognitive impairment is associated with hippocampal neurogenesis**. (A) Cluster heat-map analysis and statistical analysis of differentially expressed genes (DEGs). (B) Quantification of the Sox2 and Nes mRNA expression in the hippocampus (n=3 per group). (C) Schematic diagram of the SGZ of the DG at the hippocampus and of the BrdU protocol used. (D-F) Representative images of BrdU, Ki67 and DCX immunostaining at SGZ and quantification analysis of BrdU+, Ki67+ and DCX+ cells (n = 8 segments/group, sampled from 3-5 mice/treatment condition). Scale bar = 100/200 μm. The data are shown as mean ± SEM. * *p*<0.05; ** *p*<0.01; *** *p*<0.001; *****p*<0.0001.

**Supplementary Fig4**. **METH weakened hippocampal neurogenesis through GSK3β/β-catenin pathway**. (A, C) Quantification of the Ctnnb1, proliferation gene Ccnd1, c-Myc and differentiation gene Neurod1, Neurog2 mRNA expression in the hippocampus. (B) Quantitative analysis of p-GSK3β/GSK3β and total-β-catenin in the hippocampus. n=3-5 per group. The data are shown as mean ± SEM. * *p*<0.05; ** *p*<0.01; *** *p*<0.001; **** *p*<0.0001.

**Supplementary Fig5**. **NSCs-specific overexpression of β-catenin promoted cell cycle entry**. (A) Experimental configuration and representative confocal image of AAV-GFP or AAV-β-catenin injected into the hippocampus. (B, C) Quantitative analysis of and total-β-catenin and Nuc-β-catenin in the hippocampus. (D) Quantification of Ccnd1, c-Myc, Neurod1 and Neurog2 mRNA expression in the hippocampus. (E) Representative images of BrdU/Ki67 co-labelling and quantification analysis of METH-induced proportion of cells exiting or re-entering the cell cycle at SGZ. n=3-5 per group. Scale bar =100/500 μm. The data are shown as mean ± SEM. **p*<0.05; ** *p*<0.01; *** *p*<0.001; **** *p*<0.0001; ns, No significance.
